# Supplementary material for: Modulation of virus-induced NF-κB signaling by NEMO coiled coil mimics
Source: PubMed Central journal article supplement (PMC7156456; doi:10.1038/s41467-020-15576-3), 2020-04-14
Supplement: 41467_2020_15576_MOESM2_ESM.pdf [file 41467_2020_15576_MOESM2_ESM.pdf]

## Reporting Summary

Nature Research wishes to improve the reproducibility of the work that we publish. This form provides structure for consistency and transparency in reporting. For further information on Nature Research policies, see [Authors & Referees](#) and the [Editorial Policy Checklist](#).

### Statistics

For all statistical analyses, confirm that the following items are present in the figure legend, table legend, main text, or Methods section.

n/a Confirmed

- |                                     |                                     |                                                                                                                                                                                                                                                            |
|-------------------------------------|-------------------------------------|------------------------------------------------------------------------------------------------------------------------------------------------------------------------------------------------------------------------------------------------------------|
| <input type="checkbox"/>            | <input checked="" type="checkbox"/> | The exact sample size ( $n$ ) for each experimental group/condition, given as a discrete number and unit of measurement                                                                                                                                    |
| <input type="checkbox"/>            | <input checked="" type="checkbox"/> | A statement on whether measurements were taken from distinct samples or whether the same sample was measured repeatedly                                                                                                                                    |
| <input type="checkbox"/>            | <input checked="" type="checkbox"/> | The statistical test(s) used AND whether they are one- or two-sided<br><i>Only common tests should be described solely by name; describe more complex techniques in the Methods section.</i>                                                               |
| <input checked="" type="checkbox"/> | <input type="checkbox"/>            | A description of all covariates tested                                                                                                                                                                                                                     |
| <input type="checkbox"/>            | <input checked="" type="checkbox"/> | A description of any assumptions or corrections, such as tests of normality and adjustment for multiple comparisons                                                                                                                                        |
| <input type="checkbox"/>            | <input checked="" type="checkbox"/> | A full description of the statistical parameters including central tendency (e.g. means) or other basic estimates (e.g. regression coefficient) AND variation (e.g. standard deviation) or associated estimates of uncertainty (e.g. confidence intervals) |
| <input type="checkbox"/>            | <input checked="" type="checkbox"/> | For null hypothesis testing, the test statistic (e.g. $F$ , $t$ , $r$ ) with confidence intervals, effect sizes, degrees of freedom and $P$ value noted<br><i>Give <math>P</math> values as exact values whenever suitable.</i>                            |
| <input checked="" type="checkbox"/> | <input type="checkbox"/>            | For Bayesian analysis, information on the choice of priors and Markov chain Monte Carlo settings                                                                                                                                                           |
| <input checked="" type="checkbox"/> | <input type="checkbox"/>            | For hierarchical and complex designs, identification of the appropriate level for tests and full reporting of outcomes                                                                                                                                     |
| <input checked="" type="checkbox"/> | <input type="checkbox"/>            | Estimates of effect sizes (e.g. Cohen's $d$ , Pearson's $r$ ), indicating how they were calculated                                                                                                                                                         |

*Our web collection on [statistics for biologists](#) contains articles on many of the points above.*

### Software and code

Policy information about [availability of computer code](#)

Data collection

TR-FRET data was collected using gen5 software , absorbance at 280nm was collected using FPLC system FPLC software, live confocal images were collected using ZEN microscope and imaging software, Flow cytometry data were collected using BD FACSDiVa™ software, bioluminescence images and quantification were collected using IVIS living image software

Data analysis

Microsoft excel 2010, Graphpad Prism version 6, FlowJo version 8.8.6, Fiji image processing package, Alphaspace 1.0 (<http://www.nyu.edu/projects/yzhang/AlphaSpace/>), Rosetta computational alanine scanning

For manuscripts utilizing custom algorithms or software that are central to the research but not yet described in published literature, software must be made available to editors/reviewers. We strongly encourage code deposition in a community repository (e.g. GitHub). See the Nature Research [guidelines for submitting code & software](#) for further information.

### Data

Policy information about [availability of data](#)

All manuscripts must include a [data availability statement](#). This statement should provide the following information, where applicable:

- Accession codes, unique identifiers, or web links for publicly available datasets
- A list of figures that have associated raw data
- A description of any restrictions on data availability

Data generated or analyzed during this study are included in the published article (and its supplementary information files) or are available from the corresponding author upon reasonable request, see author contributions for specific data sets.

## Field-specific reporting

Please select the one below that is the best fit for your research. If you are not sure, read the appropriate sections before making your selection.

Life sciences  Behavioural & social sciences  Ecological, evolutionary & environmental sciences

For a reference copy of the document with all sections, see [nature.com/documents/nr-reporting-summary-flat.pdf](https://nature.com/documents/nr-reporting-summary-flat.pdf)

## Life sciences study design

All studies must disclose on these points even when the disclosure is negative.

|                 |                                                                                                                                                                                                                                                                                                                                                                 |
|-----------------|-----------------------------------------------------------------------------------------------------------------------------------------------------------------------------------------------------------------------------------------------------------------------------------------------------------------------------------------------------------------|
| Sample size     | No statistical method was used to determine sample size before experiments were performed. Sample size was calculated based on estimated effect. Data represent two or three independent experiments each performed in replicates. Single experiments were performed for assay types such as protein expression and purification, size exclusion chromatography |
| Data exclusions | No data was excluded                                                                                                                                                                                                                                                                                                                                            |
| Replication     | Experiments were performed in duplicates and triplicates and repeated independently n=2 or n=3 as described in legend. Mice xenograft study was done once with n=10 control and n=5 peptide treated group                                                                                                                                                       |
| Randomization   | Engrafted mice were randomized into vehicle and treated group. Each group had mice with similar low and high tumor burden to normalize for engraftment variability                                                                                                                                                                                              |
| Blinding        | Data collection and analysis was not performed blindly                                                                                                                                                                                                                                                                                                          |

## Reporting for specific materials, systems and methods

We require information from authors about some types of materials, experimental systems and methods used in many studies. Here, indicate whether each material, system or method listed is relevant to your study. If you are not sure if a list item applies to your research, read the appropriate section before selecting a response.

### Materials & experimental systems

| n/a                                 | Included in the study                                           |
|-------------------------------------|-----------------------------------------------------------------|
| <input type="checkbox"/>            | <input checked="" type="checkbox"/> Antibodies                  |
| <input type="checkbox"/>            | <input checked="" type="checkbox"/> Eukaryotic cell lines       |
| <input checked="" type="checkbox"/> | <input type="checkbox"/> Palaeontology                          |
| <input type="checkbox"/>            | <input checked="" type="checkbox"/> Animals and other organisms |
| <input checked="" type="checkbox"/> | <input type="checkbox"/> Human research participants            |
| <input checked="" type="checkbox"/> | <input type="checkbox"/> Clinical data                          |

### Methods

| n/a                                 | Included in the study                              |
|-------------------------------------|----------------------------------------------------|
| <input checked="" type="checkbox"/> | <input type="checkbox"/> ChIP-seq                  |
| <input type="checkbox"/>            | <input checked="" type="checkbox"/> Flow cytometry |
| <input checked="" type="checkbox"/> | <input type="checkbox"/> MRI-based neuroimaging    |

## Antibodies

### Antibodies used

The following primary antibodies were used: NEMO (1:500 or 1:1000, GTX107582, lot# 39946), GAPDH (1:25,000, GTX100118, lot #41577) from Genetex. phospho IKKα/ (Ser176/180) (1: 500, clone 16A6, cat #2697S, lot# 13), phospho p65 (Ser536) (1:500, clone 93H1, cat# 3033S, lot #6), total p65 (1:500, clone C22B4, cat# 4764S, Lot# 8), phospho IκBα (S32/36) (1:500, cat# 9246S, lot#23), IκB (1:800, cat# 4814, lot #4), IKK (1:700, clone D30C6, cat #8943S, lot# 4) and HSP90 antibody (1:1000, 4877T) from cell signaling technology. IKKα (1:300, H-744, sc-7218, lot# 2903), NEMO (1:200, cat # sc-8330, lot# D0414) for pull down experiment, phospho p65 (1:200, sc-101748, lot D2809) for cell fractionation experiment and PCNA (1:500, cat # sc- 56, lot# E2814) were purchased from Santa Cruz Biotechnology. Anti-Flag (1:1000, cat# 600-401-383, lot# 28976) from Rockland. A rat monoclonal antibody to vFLIP (1:200, clone 4C1) was kindly provided by Elisabeth Kremmer at Helmholtz Zentrum Munchen, Germany. Secondary anti-HRP rabbit antibody (1:5000, NA9340V, GE healthcare), Secondary anti-HRP mouse antibody (1:2000, NA931V, GE healthcare) and goat anti-rat IgG (H&L) HRP antibody (1:5000, 62-9520, ThermoFisher Scientific). Rabbit Trueblot anti-Rabbit IgG HRP (1:1000, Rockland 18-8816-3, lot 30172) to enable detection of NEMO in the immunoprecipitated BC-1 cells without interference of the heavy or light chains.

### Validation

Validation statement for each antibody is provided on the manufacturer's website. vFlip antibody was validated in non-PEL cell lines that are not infected with KSHV so they don't express the viral protein vFLIP. Flag antibody was validated in Namalwa cell line that is not induced with doxycycline. This cell line doesn't express the inducible flag-tagged vFLIP protein unless doxycycline was added

## Eukaryotic cell lines

Policy information about [cell lines](#)

### Cell line source(s)

BC1, BC2 and BC3 PEL cell lines were established in Dr. Cesarman laboratory from lymphomatous effusions as described previously (cesarman, 1995, arvanitakis, 1996), BCBL-1 was obtained from the AIDS and Cancer Specimen Bank. Namalwa Burkitt lymphoma cell line was purchased from American Type Culture Collection (ATCC). Stable WT vFLIP and mutant vFLIP inducible Namalwa cell lines were generated from the parental Namalwa cell line by lentiviral transduction. BC3-NF-kb luc cell line was generated from BC3 cell line using plasmid selection. HeLa cells were purchased from ATCC (lot# 70016358)

|                                                                   |                                                                                                                                                              |
|-------------------------------------------------------------------|--------------------------------------------------------------------------------------------------------------------------------------------------------------|
| Authentication                                                    | BC1, BC3, BC2, BCBL-1, Namalwa and HeLa cell lines were authenticated by short tandem repeat analysis (STR) profiling at IDEXX research                      |
| Mycoplasma contamination                                          | All cell lines were tested negative for mycoplasma contamination using IDEXX Bioresearch services or in the lab using PCR Mycoplasma Detection Kit (abmGood) |
| Commonly misidentified lines (See <a href="#">ICLAC</a> register) | no commonly misidentified cell lines were used                                                                                                               |

## Animals and other organisms

Policy information about [studies involving animals](#); [ARRIVE guidelines](#) recommended for reporting animal research

|                         |                                                                                            |
|-------------------------|--------------------------------------------------------------------------------------------|
| Laboratory animals      | NOD.CB17-Prkdc (SCID) mice ordered from Jackson Laboratory                                 |
| Wild animals            | no wild animals were used for this study                                                   |
| Field-collected samples | the study did not include field-collected samples                                          |
| Ethics oversight        | mice studies were conducted according to IACUC protocol approved by Weill Cornell Medicine |

Note that full information on the approval of the study protocol must also be provided in the manuscript.

## Flow Cytometry

### Plots

Confirm that:

- The axis labels state the marker and fluorochrome used (e.g. CD4-FITC).
- The axis scales are clearly visible. Include numbers along axes only for bottom left plot of group (a 'group' is an analysis of identical markers).
- All plots are contour plots with outliers or pseudocolor plots.
- A numerical value for number of cells or percentage (with statistics) is provided.

### Methodology

|                           |                                                                                                                                                                                                                                                                                                                                                                                                                                                                                                                                                                                                                                                                                   |
|---------------------------|-----------------------------------------------------------------------------------------------------------------------------------------------------------------------------------------------------------------------------------------------------------------------------------------------------------------------------------------------------------------------------------------------------------------------------------------------------------------------------------------------------------------------------------------------------------------------------------------------------------------------------------------------------------------------------------|
| Sample preparation        | Details are outlined in materials and methods section. BC-1 PEL cells were treated with DMSO or increasing concentrations of the CHD3NEMO or CHD4NEMO peptide for one hour in the absence of serum then 20% FBS was added 1hr after serum starvation. Cells were harvested at 48 hrs post-treatment, washed once in PBS and resuspended in Annexin V staining buffer (BD Pharmingen Catalog No. 556454) containing 3 $\mu$ L/test AnnexinV-Alexa Fluor 647 (ThermoFisher A23204) and 1 $\mu$ L/test DAPI (Sigma D9542) and incubated at room temperature for 15 minutes in the dark. (Single stain compensation controls were used: unstained cells, DAPI only and Alexa647 only) |
| Instrument                | BD LSRII analytical flow cytometer                                                                                                                                                                                                                                                                                                                                                                                                                                                                                                                                                                                                                                                |
| Software                  | Flow cytometry data were collected using BD FACSDiVa™ software and data was analyzed using FlowJo version 8.8.6                                                                                                                                                                                                                                                                                                                                                                                                                                                                                                                                                                   |
| Cell population abundance | 0.5 million cells were stained for each condition and 300,000 to 500,000 events were collected from control and treated cells                                                                                                                                                                                                                                                                                                                                                                                                                                                                                                                                                     |
| Gating strategy           | A representative density plot with set gates is illustrated in figure 5C. Briefly, histogram with single stain compensation controls were used to distinguish positive and negative stains. Total population (live and dead cells) were gated on after excluding cellular debris based on their FSC-SSC distribution. Bivariate pseudocolor plot (Annexin-Alexa647, DAPI-Pacific blue) using single stain compensation controls was used to set the gates and the same gate was applied to all sample conditions.                                                                                                                                                                 |

Tick this box to confirm that a figure exemplifying the gating strategy is provided in the Supplementary Information.
