# Supplementary material for: Modulation of virus-induced NF-κB signaling by NEMO coiled coil mimics
Source: PubMed Central journal article supplement (PMC7156456; doi:10.1038/s41467-020-15576-3), 2020-04-14

Full blots corresponding to each Figure

Figure 4. (c) CHD3<sup>NEMO</sup> disrupts vFLIP/NEMO interaction in live cells.

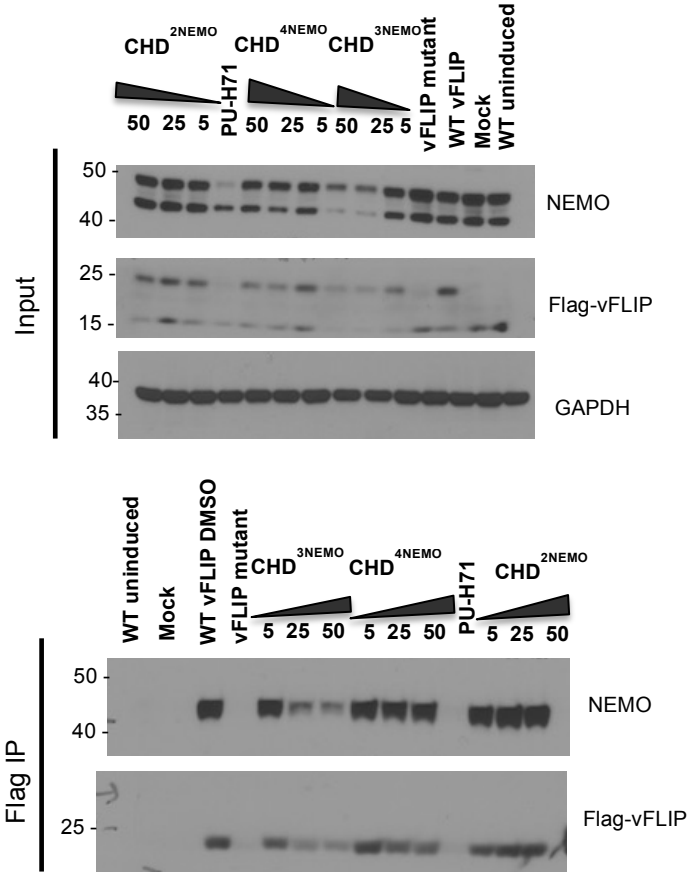

**Figure 6 (d)** Mice treated with **CHD3<sup>NEMO</sup>** for 24hrs have attenuated NF- $\kappa$ B signaling in tumor cells.

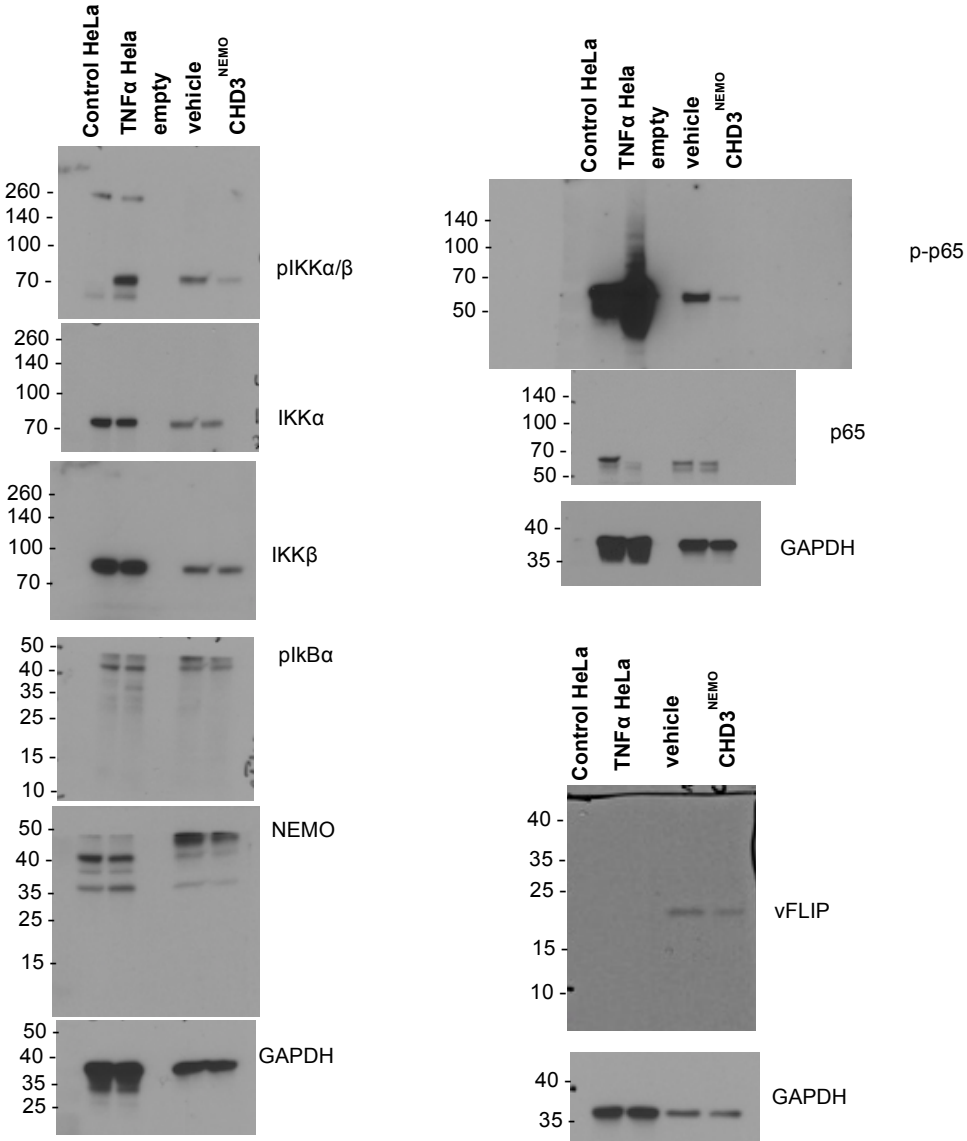

**Supplementary Figure 5. CHD3<sup>NEMO</sup> inhibits NF- $\kappa$ B signaling in BC1 PEL cell line.**

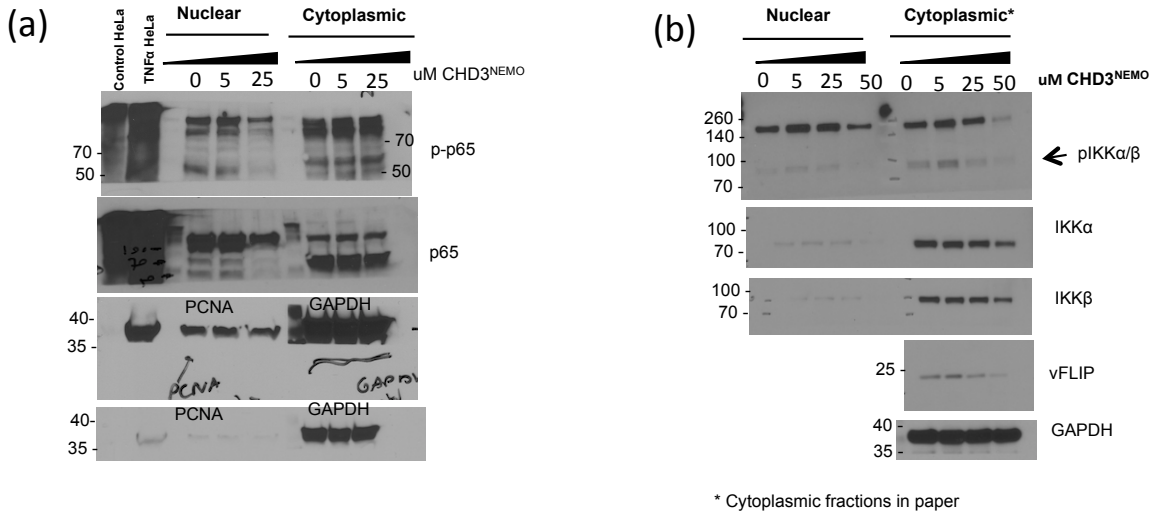

**Supplementary Figure 6. CHD3<sup>NEMO</sup> pretreatment does not block TNF $\alpha$  stimulation and NF- $\kappa$ B signaling in HeLa cells.**

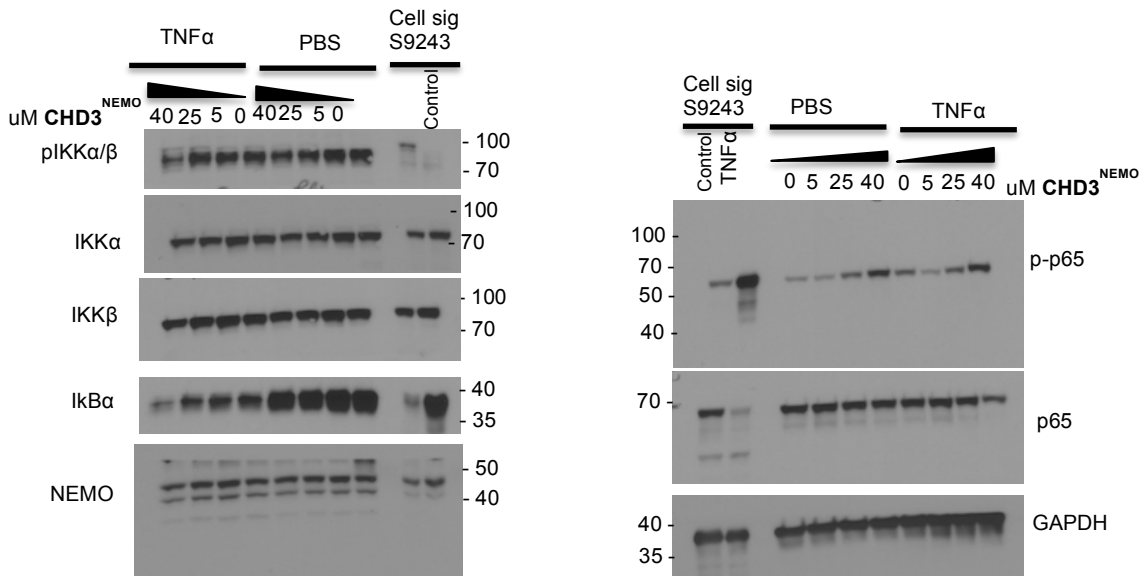

**Supplementary Figure 7. CHD3<sup>NEMO</sup> treatment downregulates vFLIP target expression in BC-1 PEL cells**

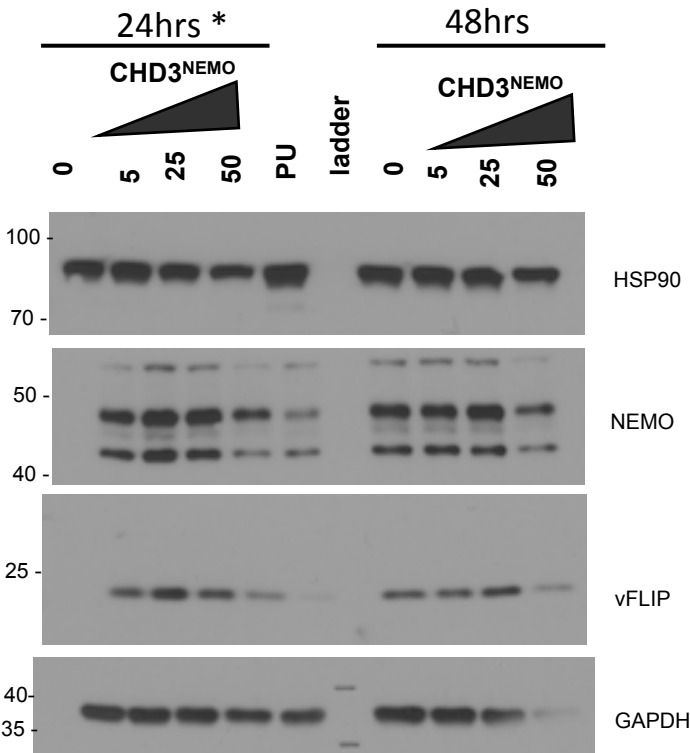

\*24hr Included in paper

**Supplementary Figure 8. CHD3<sup>NEMO</sup> treatment decreases vFLIP association with NEMO in BC-1 PEL cells**

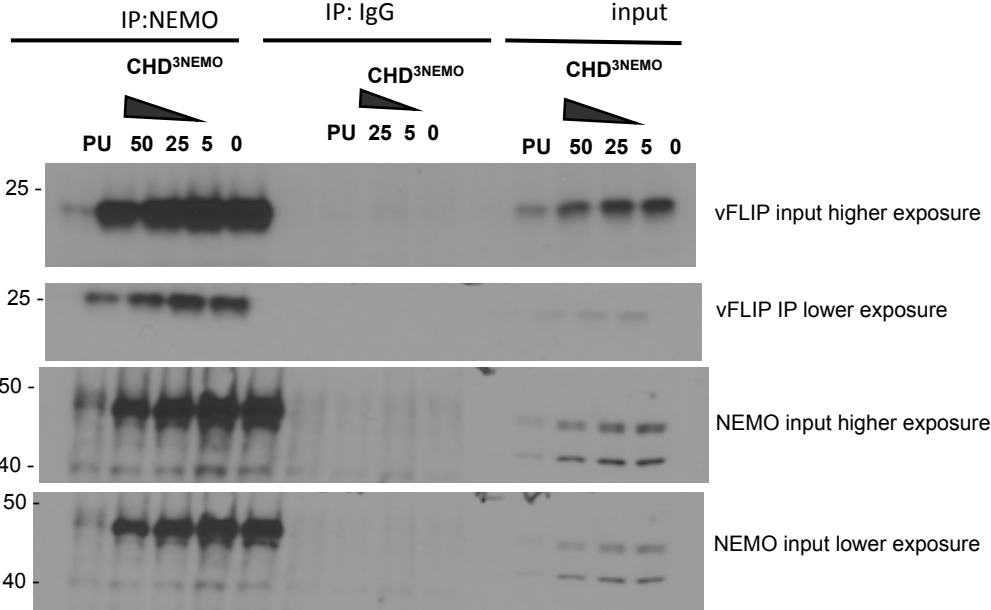

**Supplementary Figure 9. Effect of CHD3<sup>NEMO</sup> on NEMO levels in Namalwa cells expressing vFLIP target**

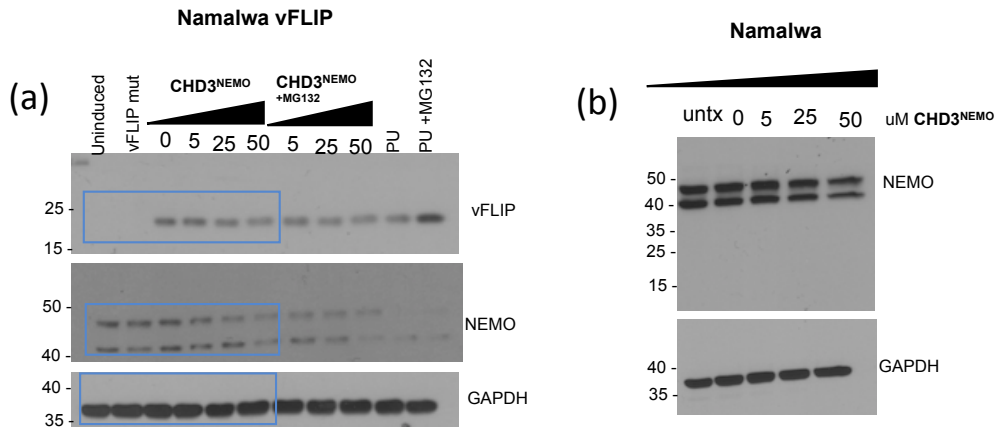

**Supplementary Figure 10. (a) and (b) vFLIP NF- $\kappa$ B dead mutant has a reduced half-life compared to WT vFLIP and MG-132 stabilizes its protein expression. (c) ) CHD3<sup>NEMO</sup> treatment disrupts vFLIP/NEMO interaction and targets them for proteasomal degradation**

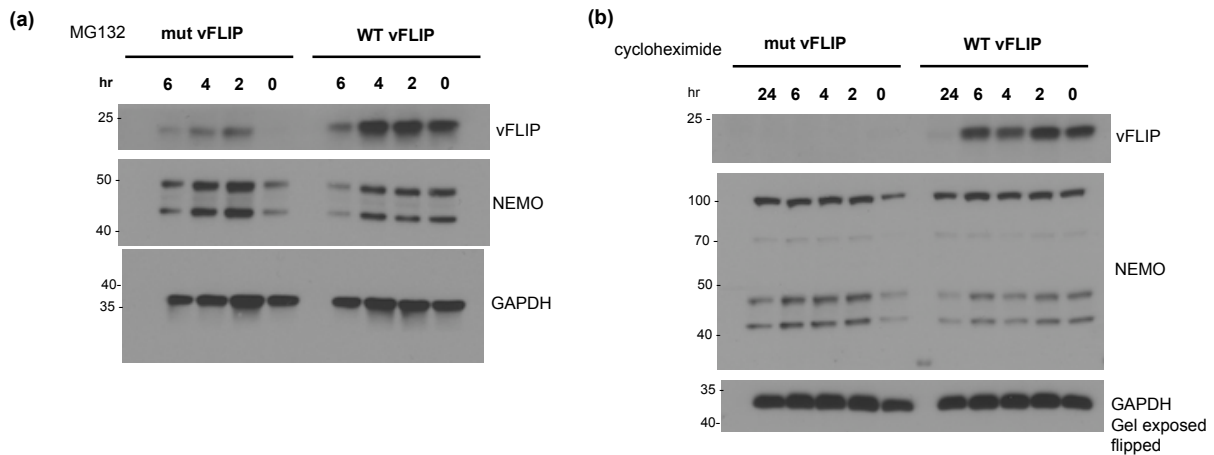

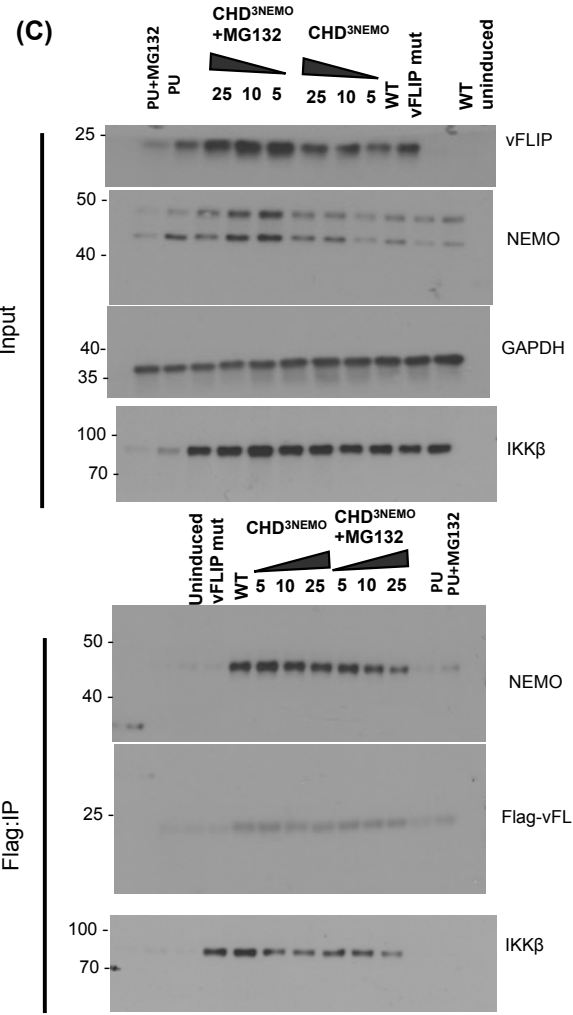

Supplement: 41467_2020_15576_MOESM3_ESM.pdf [file 41467_2020_15576_MOESM3_ESM.pdf]
